# Supplementary material for: GAM/ZFp/ZNF512B is central to a gene sensor circuitry involving cell-cycle regulators, TGFβ effectors, Drosha and microRNAs with opposite oncogenic potentials
Source: PubMed Central journal article supplement — Nucleic Acids Res. 2010 Jul 17;38(21):7673–88. doi: 10.1093/nar/gkq637 (PMC2995059; doi:10.1093/nar/gkq637), 2010-07-17
Supplement: supp_gkq637_Tili_SupplementaryInformation.pdf [file supp_gkq637_Tili_SupplementaryInformation.pdf]

**Supplementary Table 1: *miR-17-92* miRNA target sites in human *GAM* 3'-UTR whose sequence is 100% conserved in *Canis familiaris*, *Mus musculus* and *Rattus Norvegicus*.**

|                               |                                                                                |                                                                                                           |                                                                                                           |
|-------------------------------|--------------------------------------------------------------------------------|-----------------------------------------------------------------------------------------------------------|-----------------------------------------------------------------------------------------------------------|
| MiRNA target sites            | <i>miR-92a-1</i> ,<br><i>miR-92-a-2</i> ,<br><i>miR-92b</i> ,<br><i>miR-25</i> | <i>miR-17</i> , <i>miR-20a</i> ,<br><i>miR-20b</i> , <i>miR-93</i> ,<br><i>miR-106a</i> , <i>miR-106b</i> | <i>miR-17</i> , <i>miR-20a</i> ,<br><i>miR-20b</i> , <i>miR-93</i> ,<br><i>miR-106a</i> , <i>miR-106b</i> |
| Sequence match                | GUGCAAUA                                                                       | GCACUUUA                                                                                                  | GCACUUUA                                                                                                  |
| Position in <i>GAM</i> 3'-UTR | 229-236                                                                        | 2302-2309                                                                                                 | 2683-2690                                                                                                 |
| Nt changed in mutants         | CA-GUU--                                                                       | CG-GAA--                                                                                                  | C-U-AAA-                                                                                                  |

**Supplementary Table 2: *let-7* miRNA target sites in human *GAM* 3'-UTR whose sequence is 100% conserved in *Canis familiaris*, *Mus musculus* and *Rattus Norvegicus*.**

|                               |         |         |           |
|-------------------------------|---------|---------|-----------|
| <i>let-7</i> target sites     | 1       | 2       | 3         |
| Sequence match                | CUACCUC | CUACCUC | CUACCUC   |
| Position in <i>GAM</i> 3'-UTR | 499-505 | 598-604 | 2589-2595 |
| Nt changed in mutants         | GAU-GAG | GA-GGA- | G-U-G-G   |

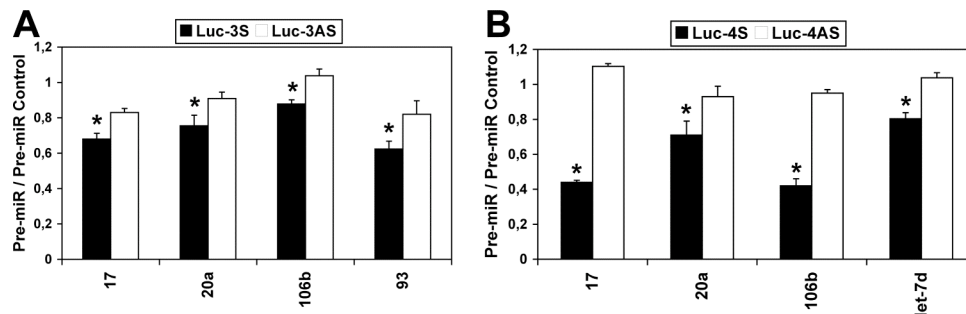

**Supplementary Figure 1: The two *miR-17/20a* and the third *let-7* sites in *GAM* 3'-UTR are respectively targeted by *miR-17-92* and *let-7* miRNAs. Luciferase assays were done with *Luc-3* (A) or *Luc-4* (B) as indicated, both in sense (S) and antisense (AS)**

orientation. Bars show the ratios of the *Firefly* luciferase (normalized to *Renilla* luciferase) activity measured following transfection with the indicated pre-miRNAs to that obtained following transfection with the pre-miR Control for the same construct. Values represent the mean  $\pm$  standard deviation (n = 4). \*, Significantly different from pre-miR Control,  $P < 0.01$ .

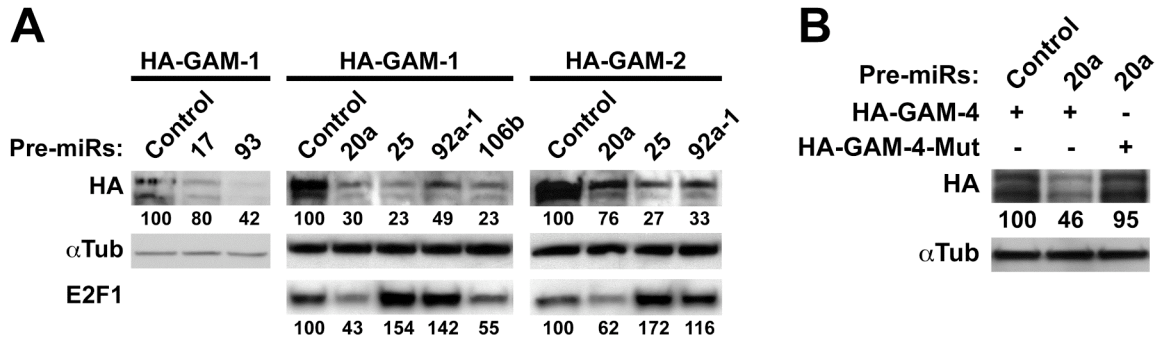

**Supplementary Figure 2: While *miR-17-92* miRNAs decrease HA-GAM levels, *miR-92a-1* and its ortholog *miR-25* upregulate E2F1. A,B.** HEK-293 cells were transfected with either *HA-GAM-1* or *HA-GAM-2* (A) or *HA-GAM-4* or *HA-GAM-4-Mut* (a construct containing a mutated *miR-17/20a* target site) (B), along with a pre-miR-Control or the indicated pre-miRNAs. Western blots were first analyzed with anti-HA antibody and then reprobred with the indicated antibodies.

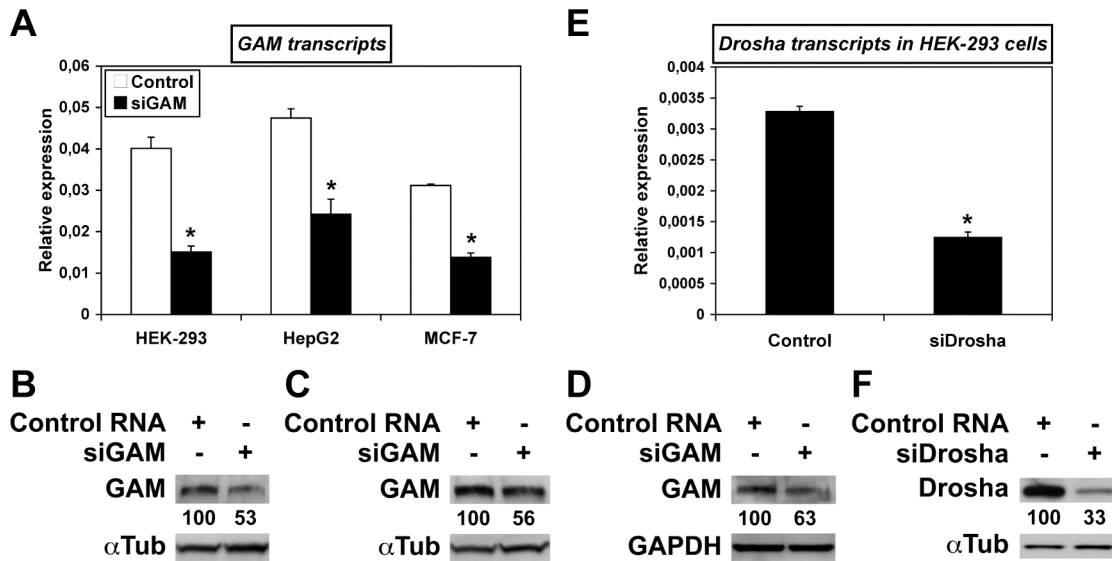

**Supplementary Figure 3: Validation of siRNAs directed against *GAM* (*siGAM*) and *Drosha* (*siDrosha*) transcripts.** The downregulation of *GAM* transcripts following transfection with *siGAM* (A) and the downregulation of *Drosha* transcripts following transfection with *siDrosha* (E) were determined by qRT-PCR. Values represent the mean  $\pm$  standard deviation (n = 3). \*, Significantly different from Control RNA,  $P < 0.0001$ . The respective effects of *siGAM* on *GAM* levels in HEK-293 (B), HepG2 (C) and MCF-7 cells (D) and those of *siDrosha* on *Drosha* levels in HEK-293 cells (F) were determined by Western Blotting.

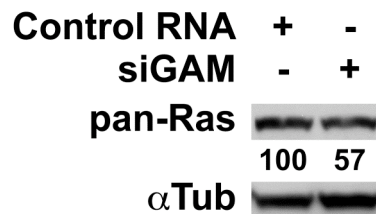

**Supplementary Figure 4: *siGAM* decreases Ras levels.** The effects of *siGAM* on Ras factors in HEK-293 cells were determined by Western Blotting using a pan-Ras antibody.

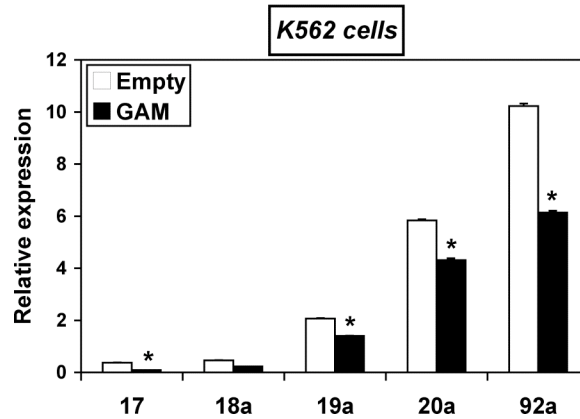

**Supplementary Figure 5: GAM downregulates *miR-17-92* miRNAs in K562**

**lymphoid cells.** The relative levels of *miR-17-92* miRNAs in K562 cells transfected with either *pCMV-HA* (Empty) or *pCMV-HA-GAM* (GAM) were determined by qRT-PCR. Values represent the mean  $\pm$  standard deviation (n = 3). \*, Significantly different from Empty control vector,  $P < 0.05$ .

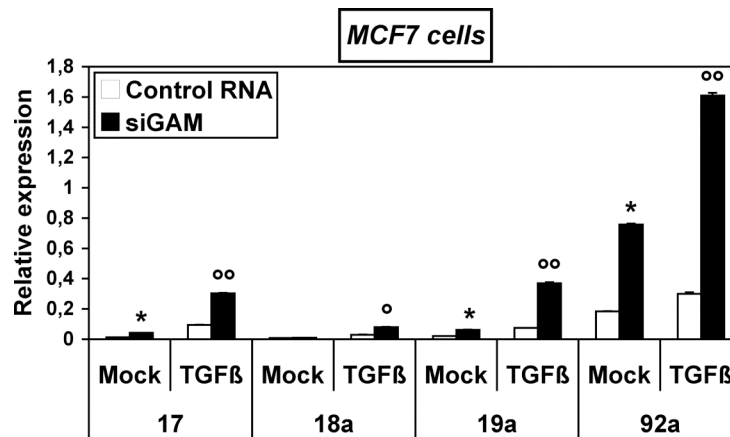

**Supplementary Figure 6: Both GAM and TGFβ have differential yet opposite**

**effects on *miR-17-92* miRNA levels.** MCF7 cells were transfected with either a control RNA or *siGAM*. 34 hours later, they were either mock-treated or treated with TGFβ as indicated. The relative levels of the indicated miRNAs were determined by qRT-PCR. Values represent the mean  $\pm$  standard deviation (n = 3). \*, Significantly different from mock-treated Control

RNA,  $P < 0.0005$ . o and oo, Significantly different from TGF $\beta$ -treated Control RNA, o,  $P < 0.005$ , oo,  $P < 0.0005$ .

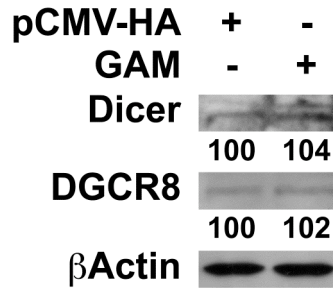

**Supplementary Figure 7: *GAM* overexpression does not change the levels of endogenous Dicer and DGCR8.** The effects of HA-GAM on Dicer and DGCR8 levels in HEK-293 cells were analyzed by Western blotting.

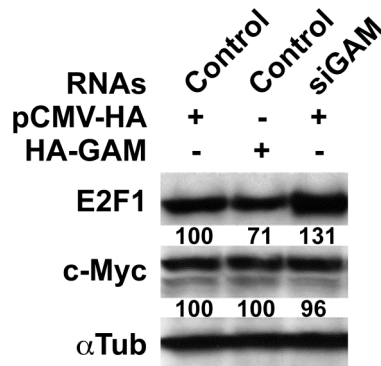

**Supplementary Figure 8: *GAM* overexpression or depletion does not change the levels of endogenous c-Myc.** The effects of HA-GAM and *siGAM* on E2F1 and c-Myc levels in HEK-293 cells were analyzed by Western blotting.

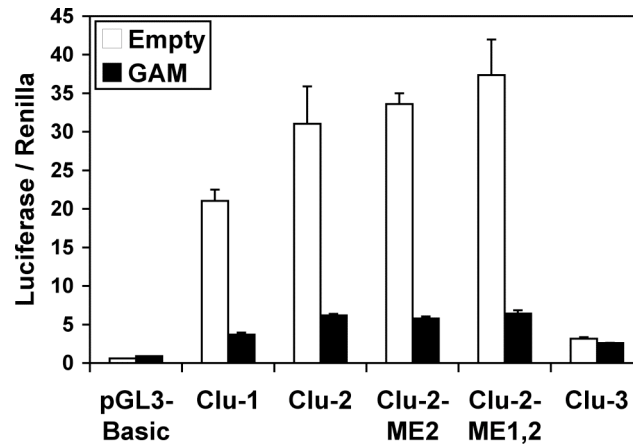

**Supplementary Figure 9: Mutating *E2F* binding sites 1 and 2 neither impairs the expression of *Clu-2* construct nor decreases GAM repressing activity.** MCF7 cells were transfected with the empty *pGL3-Basic* vector, the *Clu-1* to *Clu-3* constructs or *Clu-2* with *E2F* site 2 (*Clu-2ME2*) or *E2F* sites 1 and 2 (*Clu-2ME1,2*) mutated as indicated, along with the empty *pCMV-HA* vector or a construct expressing *GAM*. The *Firefly* luciferase activity was measured 48 hours after transfection and then normalized to the *Renilla* luciferase activity. Values represent the mean  $\pm$  standard deviation (n = 4).

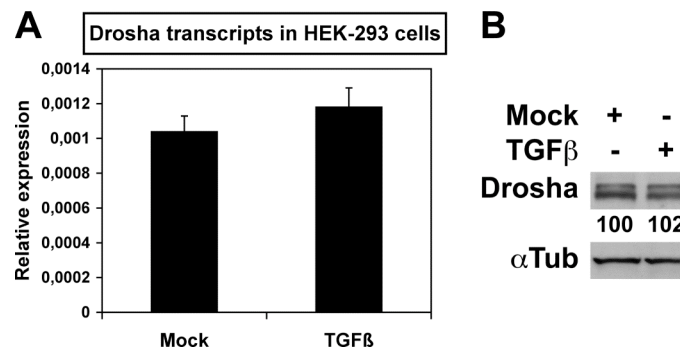

**Supplementary Figure 10: TGFβ does not change *Drosha* transcript nor *Drosha* protein levels.** The effects of TGFβ on *Drosha* transcript (A) and *Drosha* protein levels (B) were respectively analyzed by qRT-PCR and Western blotting. In A, values represent the mean  $\pm$  standard deviation (n = 3) and are not significantly different.

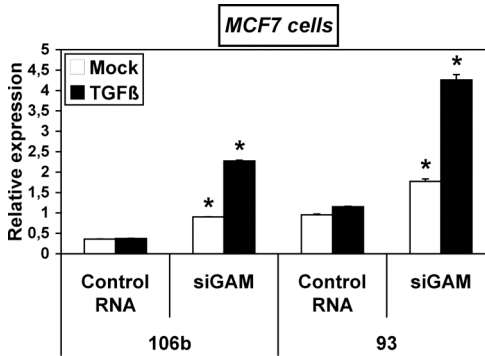

**Supplementary Figure 11: GAM also opposes the upregulation of miRNAs of the *miR-106b-93-25* cluster by TGFβ.** The levels of *miR-106b* and *miR-93* in MCF7 cells transfected with a control RNA or *siGAM* and then mock-treated or treated with TGFβ were determined by qRT-PCR. Values represent the mean ± standard deviation (n = 3). \*, Significantly different from mock-treated Control RNA,  $P < 0.05$ .

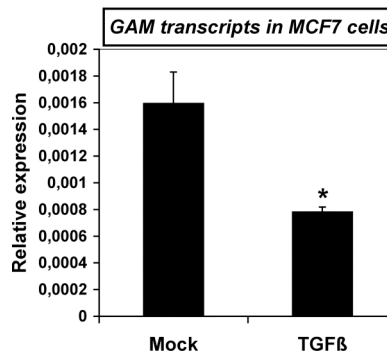

**Supplementary Figure 12: TGFβ downregulates *GAM* transcript levels in MCF7 cells.** The levels of *GAM* transcripts in MCF7 cells either mock-treated or treated with TGFβ were determined by qRT-PCR. \*, Significantly different from mock treatment,  $P < 0.01$ .
